# Supplementary material
Source: MDPI journal article supplement (https://www.mdpi.com/2073-4395/9/6/303)
Supplement: s1 [file s1]

**Table S1:** The combined influence of sugar type and type of cytokinins on the multiplication efficiency and length of the shoots.

| The Sugar Type | The Type of Cytokinins | No. of Shoots/Explant $\pm$ SE | Average Length of the Shoots $\pm$ SE (mm) |
|----------------|------------------------|--------------------------------|--------------------------------------------|
| Sucrose        | BAP                    | *12.2 $\pm$ 1.8 <sup>a</sup>   | 7.2 $\pm$ 0.3 <sup>b</sup>                 |
|                | ZEA                    | 8.5 $\pm$ 1.0 <sup>b</sup>     | 8.1 $\pm$ 0.3 <sup>b</sup>                 |
|                | 2iP                    | 3.1 $\pm$ 0.2 <sup>c</sup>     | 8.9 $\pm$ 0.5 <sup>b</sup>                 |
|                | HF                     | 2.0 $\pm$ 0.3 <sup>c</sup>     | 9.9 $\pm$ 1.1 <sup>b</sup>                 |
| Glucose        | BAP                    | 8.4 $\pm$ 1.4 <sup>b</sup>     | 6.7 $\pm$ 0.5 <sup>b</sup>                 |
|                | ZEA                    | 6.2 $\pm$ 1.0 <sup>b</sup>     | 7.2 $\pm$ 0.5 <sup>b</sup>                 |
|                | 2iP                    | 3.0 $\pm$ 0.5 <sup>c</sup>     | 8.6 $\pm$ 0.5 <sup>b</sup>                 |
|                | HF                     | 1.9 $\pm$ 0.3 <sup>c</sup>     | 15.2 $\pm$ 2.6 <sup>a</sup>                |

\* The values represent the means for type of sugar  $\times$  cytokinin combination at the concentration 0.6 mg L<sup>-1</sup> or HF medium; values within the column followed by the same letter are not significantly different according to Bonferroni tests at  $p < 0.05$ ; SE: standard error.

**Table S2:** Rooting efficiency as affected by rooting medium after 85 days of incubation.

| Rooting<br>Treatments | Percentage of Rooting $\pm$<br>SE (%) | Root Length $\pm$ SE<br>(mm) | Shoot Height $\pm$ SE<br>(mm) |
|-----------------------|---------------------------------------|------------------------------|-------------------------------|
| MS IAA2               | 83 $\pm$ 7.2 <sup>ab</sup>            | 25 $\pm$ 3.9 <sup>a</sup>    | 42 $\pm$ 3.0 <sup>a</sup>     |
| MS IBA2               | 89 $\pm$ 5.0 <sup>a</sup>             | 24 $\pm$ 3.7 <sup>a</sup>    | 34 $\pm$ 1.9 <sup>b</sup>     |
| MS HFM                | 82 $\pm$ 4.4 <sup>ab</sup>            | 25 $\pm$ 3.7 <sup>a</sup>    | 33 $\pm$ 4.6 <sup>bc</sup>    |

Values within the column followed by the same letter are not significantly different according to Bonferroni tests at  $p < 0.05$ ; SE: standard error.
